# Supplementary material for: Analysis of Primary Liquid Chromatography Mass Spectrometry Data by Neural Networks for Plant Samples Classification
Source: MDPI journal article supplement (doi:10.3390/metabo12100993), 2022-10-19

# Analysis of Primary Liquid Chromatography Mass Spectrometry Data by Neural Networks for Plant Samples Classification

Polina Turova <sup>1,\*</sup>, Andrey Stavrianidi <sup>1,2</sup>, Viktor Svekolkina <sup>3</sup>, Dmitry Lyskov <sup>4</sup>, Ilya Podolskiy <sup>5</sup>, Igor Rodin <sup>1</sup>, Oleg Shpigun <sup>1,2</sup> and Aleksey Buryak <sup>2</sup>

<sup>1</sup> Faculty of Chemistry, M.V. Lomonosov Moscow State University, 1-3 Leninskie Gory, Moscow 119991, Russia

<sup>2</sup> A.N. Frumkin Institute of Physical Chemistry and Electrochemistry, Russian Academy of Sciences, 31-4 Leninsky Prospekt, Moscow 119071, Russia

<sup>3</sup> BostonGene Corporation, University Office Park III, 95 Sawyer Road, Waltham, MA 02453, USA

<sup>4</sup> Faculty of Biology, M.V. Lomonosov Moscow State University, 1-12 Leninskie Gory, Moscow 119234, Russia

<sup>5</sup> Bruker Ltd., Pyatnitskaya 50/2 Build. 1, Moscow 119017, Russia

\* Correspondence: [turova.polina@gmail.com](mailto:turova.polina@gmail.com)

**Figure S1.** Overlay of mass chromatograms of (A) roots samples containing **compound 1** (8.96 min,  $m/z$  307); (B) all other samples which are not containing **compound 1**; (C) stems samples containing **compound 3** (10.37 min,  $m/z$  607); (D) all other samples which are not containing **compound 3**.

**Figure S2.** MS spectrum of **compound 1**

**Figure S3.** MS/MS spectrum of **compound 1** precursor ion,  $m/z$  599

**Figure S4.** MS/MS spectrum of **compound 1** precursor ion,  $m/z$  305

**Figure S5.** MS spectrum of **compound 2**

**Figure S6.** MS/MS spectrum of **compound 2** precursor ion,  $m/z$  325

**Figure S7.** MS spectrum of **compound 3**

**Figure S8.** MS/MS spectrum of **compound 3** precursor ion,  $m/z$  607

**Figure S9.** MS spectrum of **compound 4**

**Figure S10.** MS/MS spectrum of **compound 4** precursor ion,  $m/z$  603

**Figure S11.** MS spectrum of **compound 5**

**Figure S12.** MS/MS spectrum of **compound 5** precursor ion,  $m/z$  625

**Figure S13.** MS spectrum of **compound 6**

**Figure S14.** MS/MS spectrum of **compound 6** precursor ion,  $m/z$  621

**Figure S15.** MS spectrum of **compound 7**

**Figure S16.** MS/MS spectrum of **compound 7** precursor ion,  $m/z$  522

**Figure S17.** MS spectrum of **compound 8**

**Figure S18.** MS/MS spectrum of **compound 8** precursor ion,  $m/z$  520

**Figure S19.** TIC chromatograms of roots sample

**Figure S20.** TIC chromatograms of stems sample

**Figure S21.** TIC chromatograms of leaves sample

**Figure S22.** TIC chromatograms of fruits sample

**Figure S1.** Overlay of mass chromatograms of (A) roots samples containing **compound 1** (8.96 min,  $m/z$  307); (B) all other samples which are not containing **compound 1**; (C) stems samples containing **compound 3** (10.37 min,  $m/z$  607); (D) all other samples which are not containing **compound 3**.

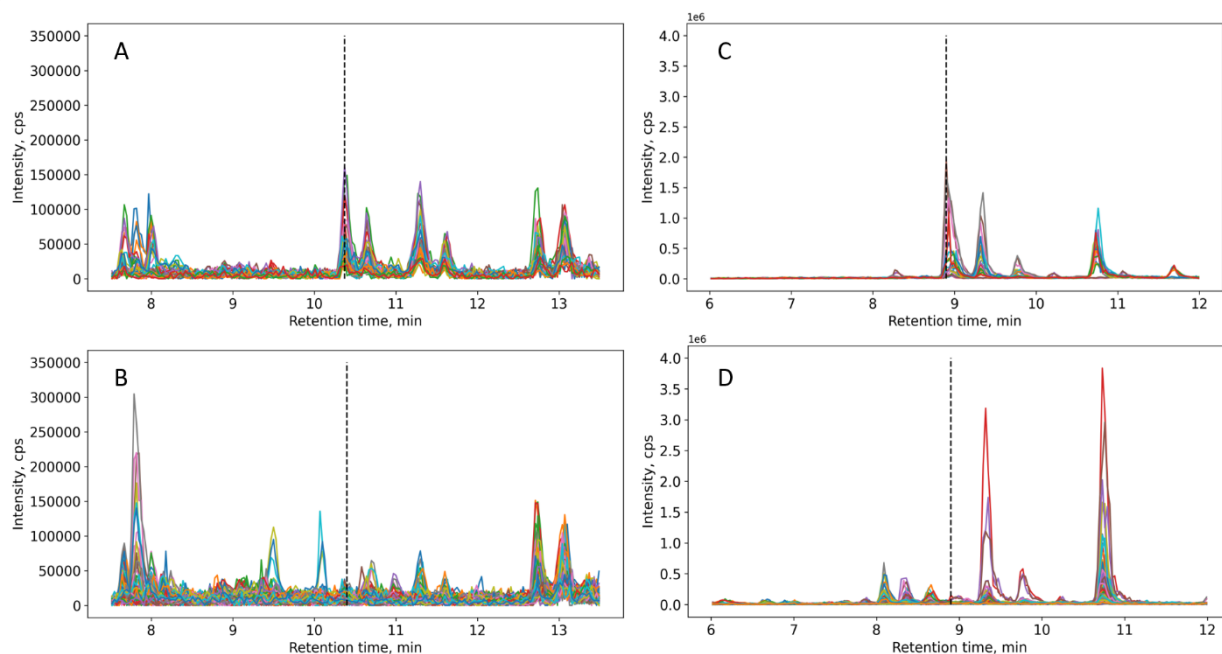

**Figure S2.** MS spectrum of **compound 1**

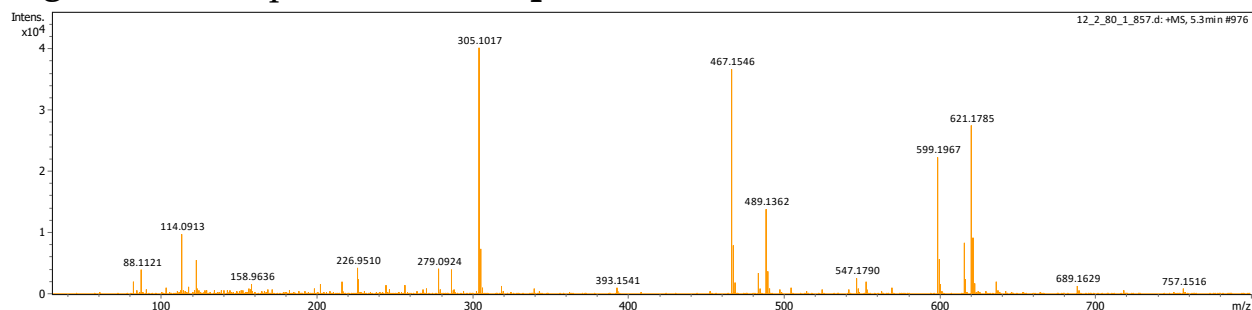

**Figure S3.** MS/MS spectrum of **compound 1** precursor ion,  $m/z$  599

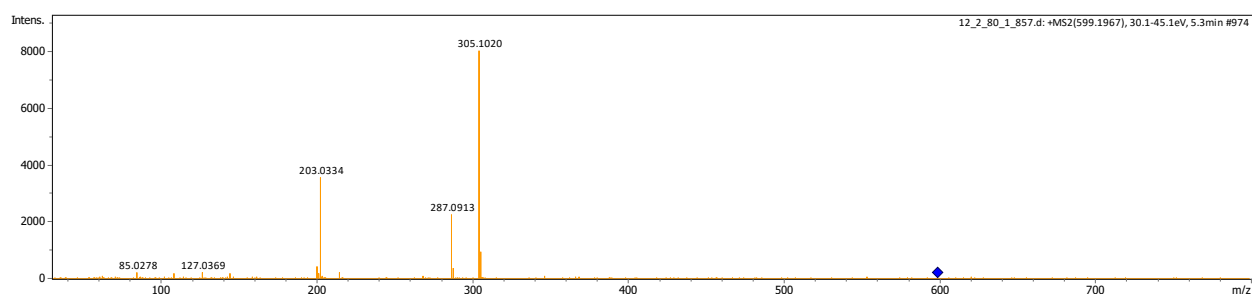

**Figure S4.** MS/MS spectrum of **compound 1** precursor ion,  $m/z$  305

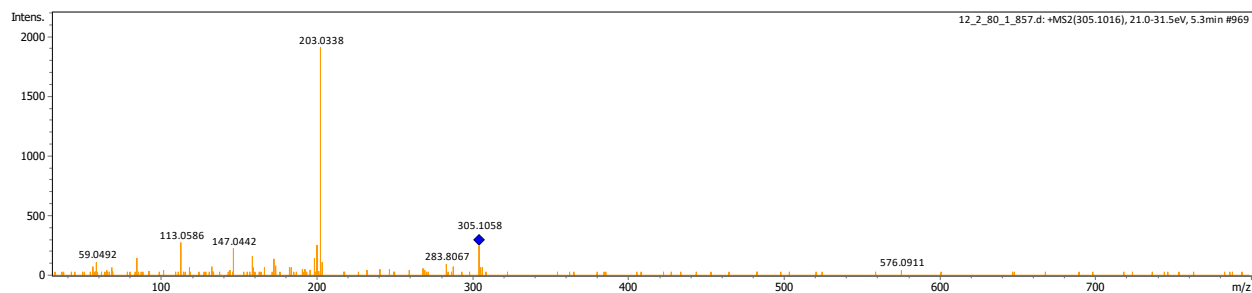

**Figure S5.** MS spectrum of **compound 2**

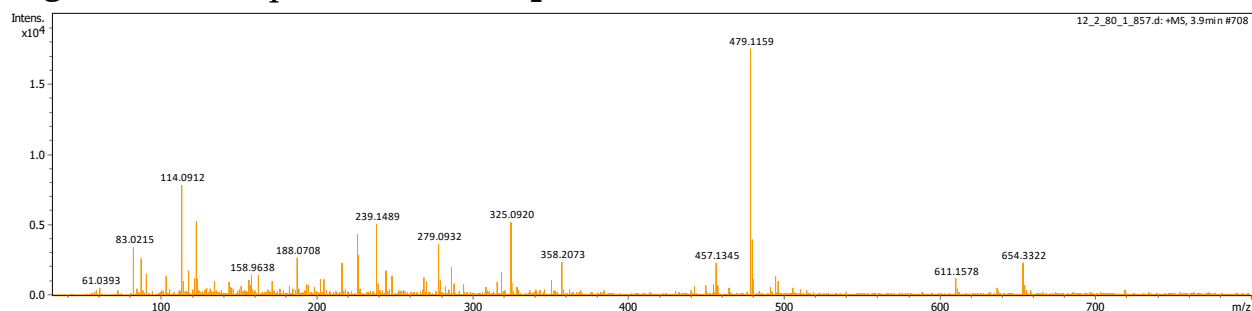

**Figure S6.** MS/MS spectrum of **compound 2** precursor ion,  $m/z$  325

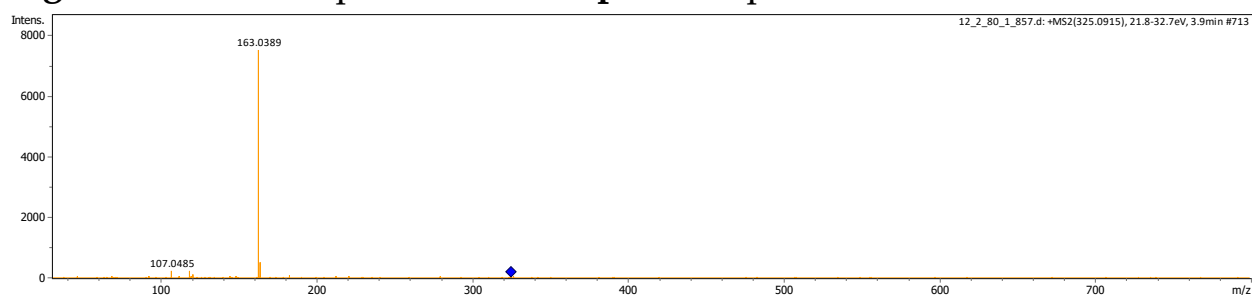

**Figure S7.** MS spectrum of **compound 3**

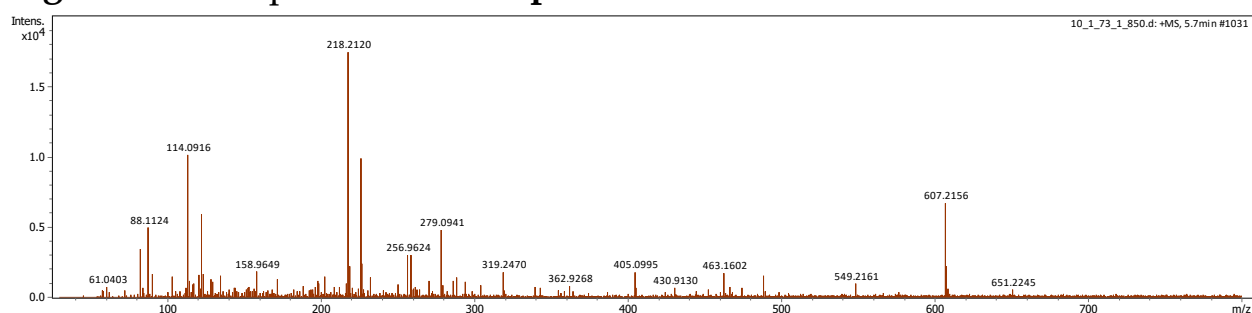

**Figure S8.** MS/MS spectrum of **compound 3** precursor ion,  $m/z$  607

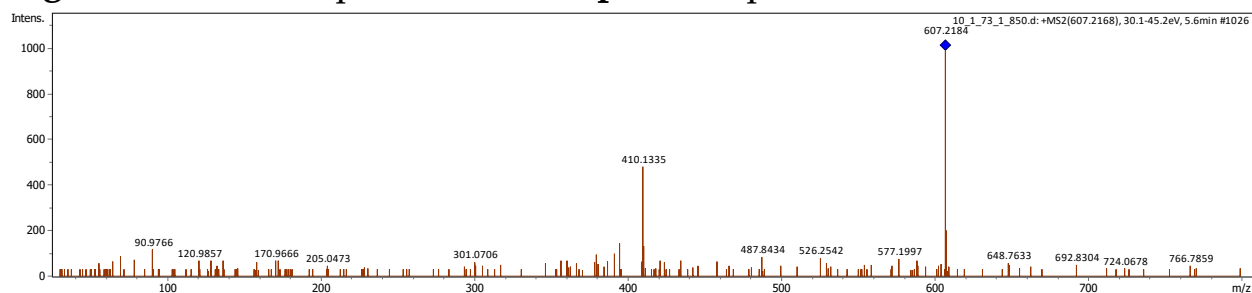

**Figure S9. MS spectrum of compound 4**

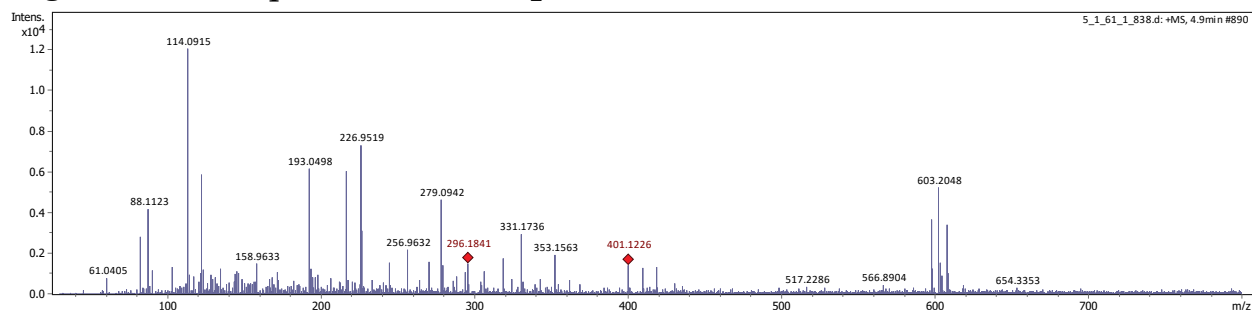

**Figure S10. MS/MS spectrum of compound 4 precursor ion,  $m/z$  603**

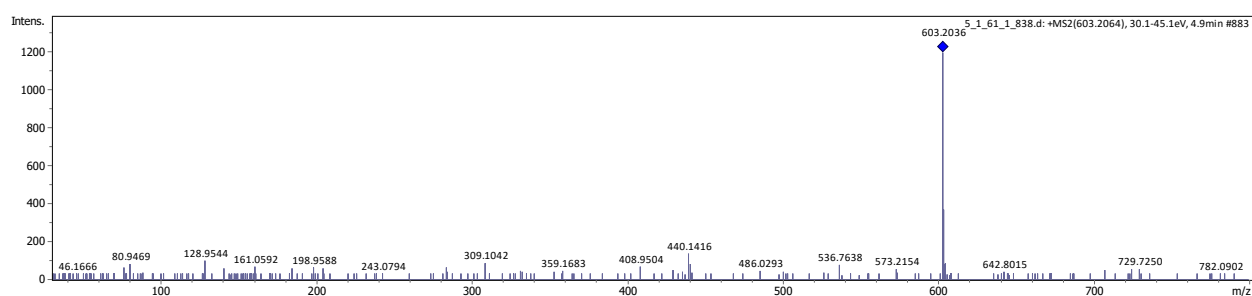

**Figure S11. MS spectrum of compound 5**

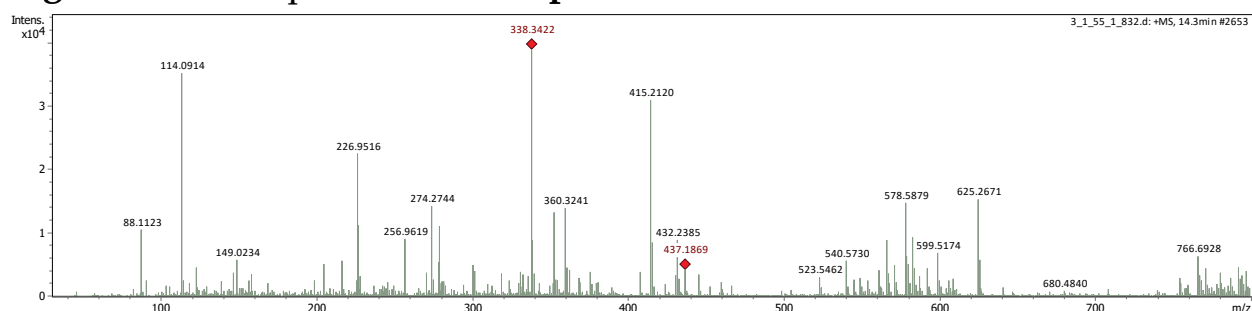

**Figure S12. MS/MS spectrum of compound 5 precursor ion,  $m/z$  625**

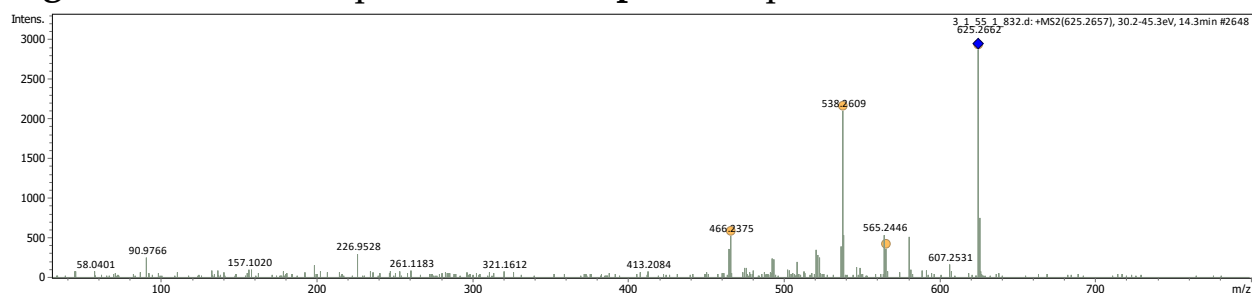

**Figure S13. MS spectrum of compound 6**

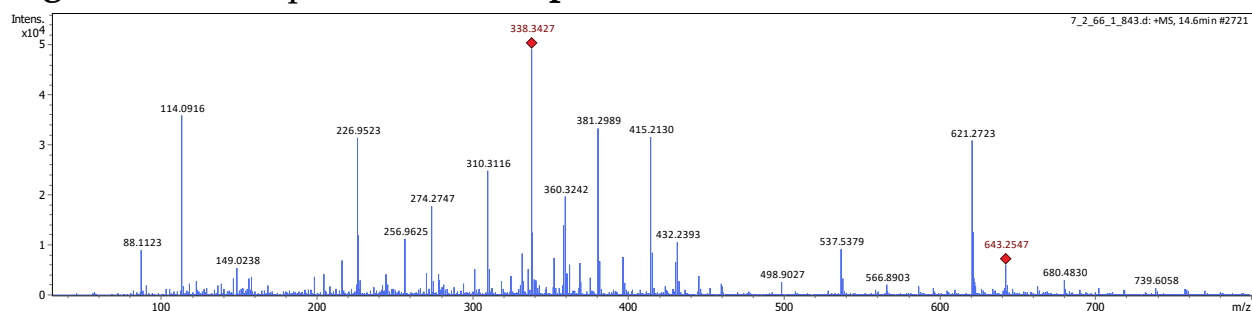

**Figure S14.** MS/MS spectrum of **compound 6** precursor ion,  $m/z$  621

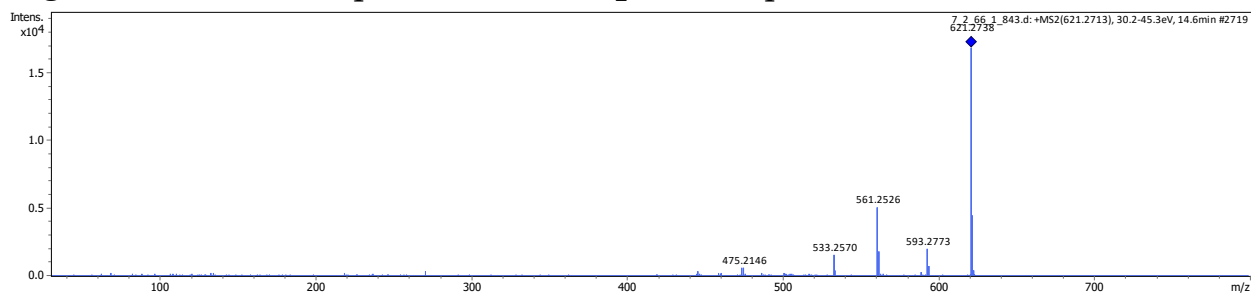

**Figure S15.** MS spectrum of **compound 7**

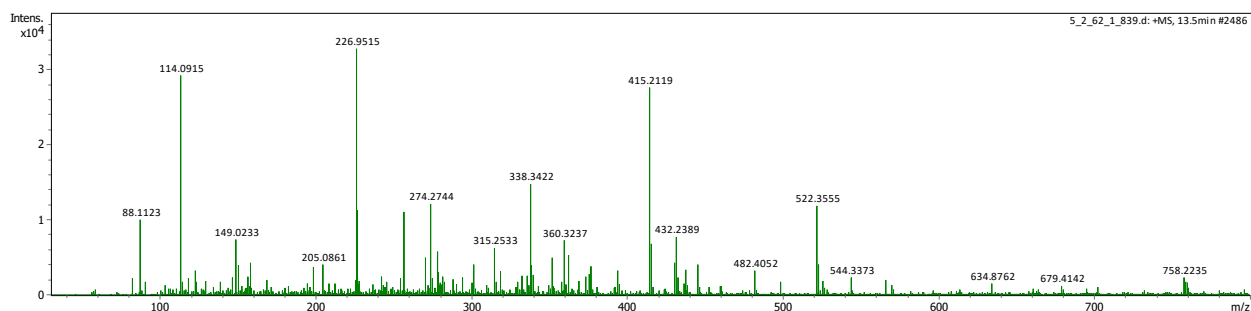

**Figure S16.** MS/MS spectrum of **compound 7** precursor ion,  $m/z$  522

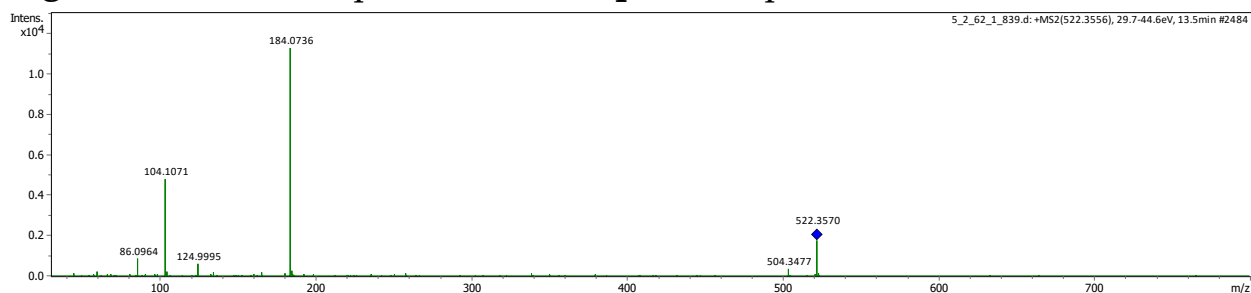

**Figure S17.** MS spectrum of **compound 8**

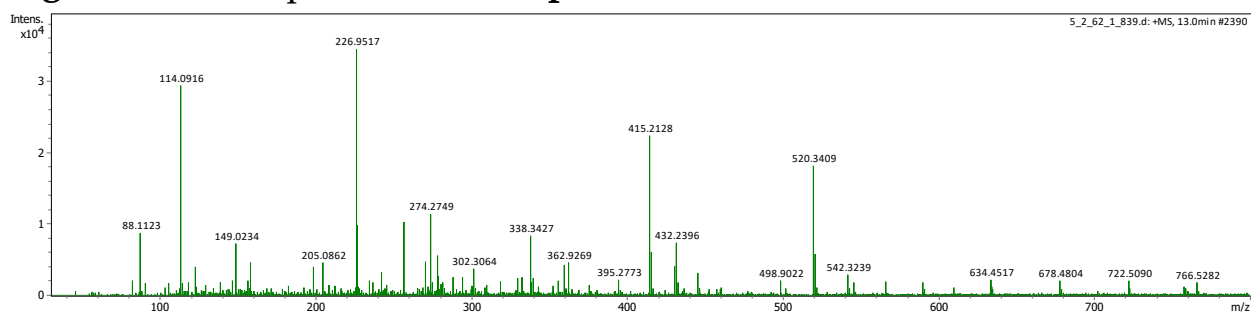

**Figure S18.** MS/MS spectrum of **compound 8** precursor ion,  $m/z$  520

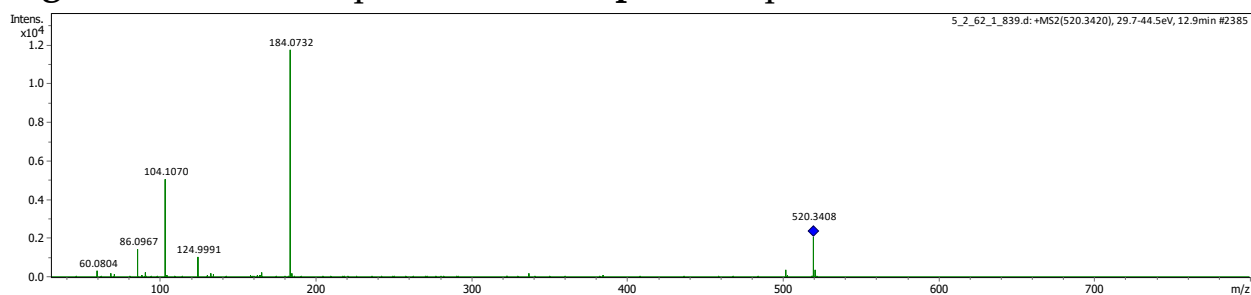

**Figure S19.** TIC chromatograms of roots samples

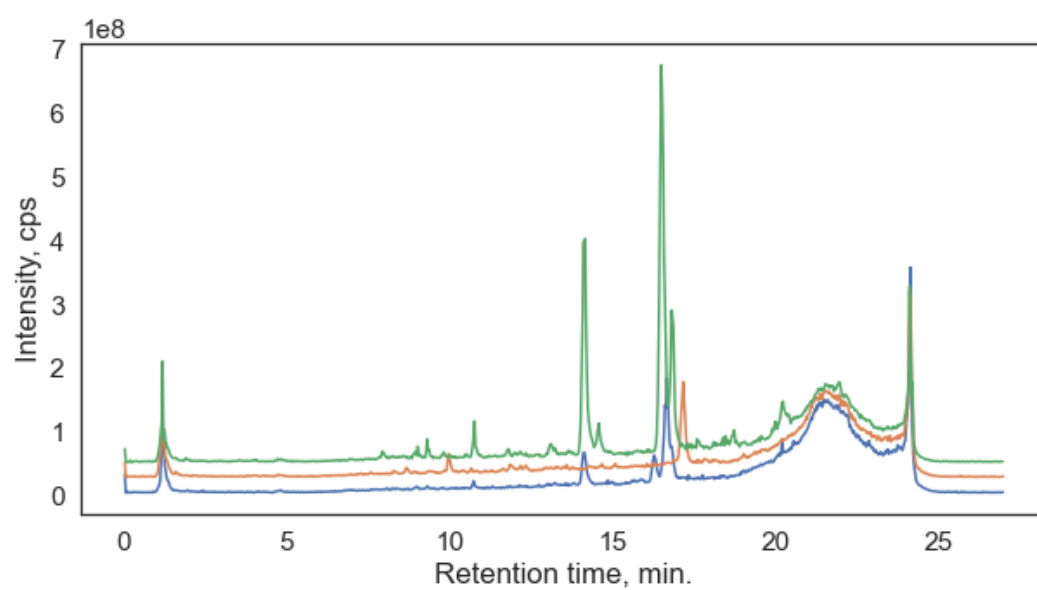

**Figure S20.** TIC chromatograms of stems samples

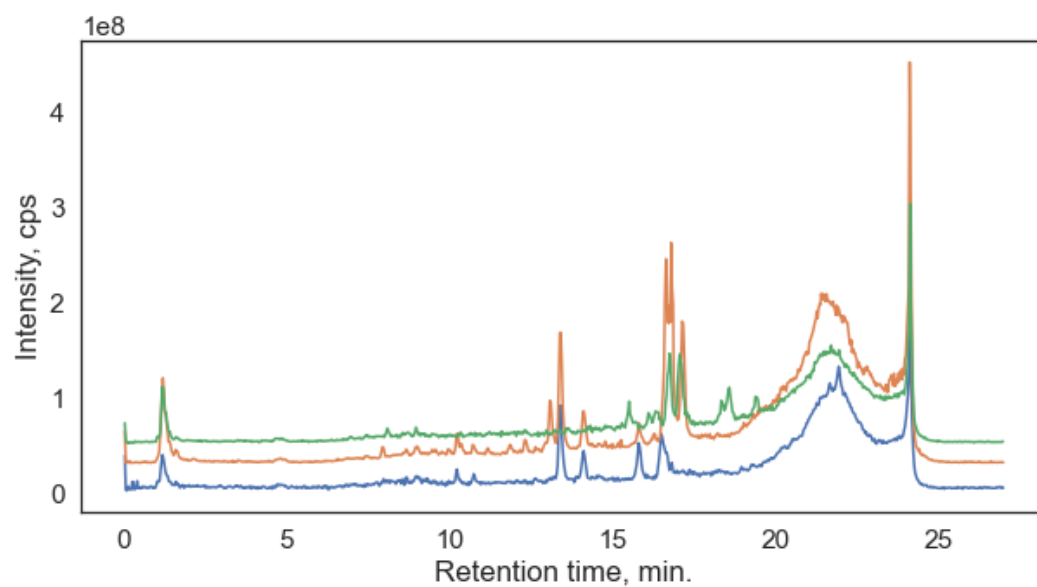



**Figure S21.** TIC chromatograms of leaves samples

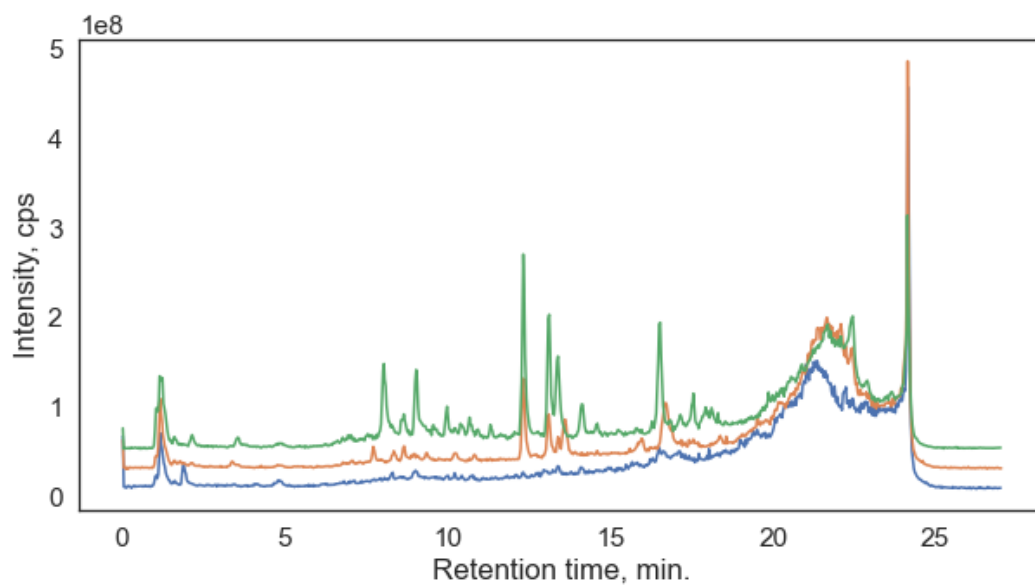

**Figure S22.** TIC chromatograms of fruits samples

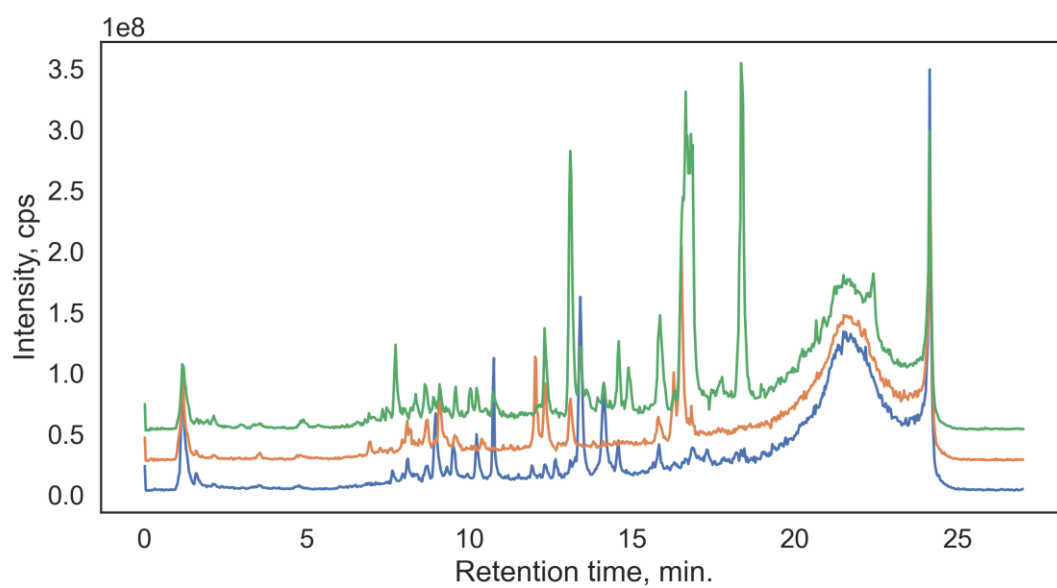

Supplement: s1 [file s1]
